# Supplementary material for: Adipokines, C-reactive protein and Amyotrophic Lateral Sclerosis – results from a population- based ALS registry in Germany
Source: PubMed Central journal article supplement (PMC5491500; doi:10.1038/s41598-017-04706-5), 2017-06-29
Supplement: 41598_2017_4706_MOESM1_ESM.pdf [file 41598_2017_4706_MOESM1_ESM.pdf]

## Supplement to

### Adipokines, C-reactive protein and Amyotrophic Lateral Sclerosis – results from a population-based ALS registry in Germany

Gabriele Nagel<sup>1</sup>, Raphael S Peter<sup>1</sup>, Angela Rosenbohm<sup>2</sup>, Wolfgang Koenig<sup>3,4,5</sup>, Luc Dupuis<sup>6</sup>, Dietrich Rothenbacher<sup>1</sup>, Albert C Ludolph<sup>2</sup>

<sup>1</sup> Institute of Epidemiology and Medical Biometry, Ulm University, Ulm, Germany

<sup>2</sup> Department of Neurology, Ulm University, Ulm, Germany

<sup>3</sup> Department of Internal Medicine II - Cardiology, University of Ulm Medical Centre, Ulm, Germany

<sup>4</sup> Deutsches Herzzentrum München, Technische Universität München, Munich, Germany

<sup>5</sup> DZHK (German Centre for Cardiovascular Research), partner site Munich Heart Alliance, Munich, Germany

<sup>6</sup> INSERM U1118, Université de Strasbourg, Strasbourg, France

#### Supplemental Table 1. Sex specific biomarker quartiles

|                          | Leptin (ng mL <sup>-1</sup> ) | Adiponectin (µg mL <sup>-1</sup> ) | hs-CRP (mg L <sup>-1</sup> ) |
|--------------------------|-------------------------------|------------------------------------|------------------------------|
| <b>Men</b>               |                               |                                    |                              |
| Bottom quartile          | -3.58                         | -4.50                              | -0.55                        |
| 2 <sup>nd</sup> quartile | >3.58-6.91                    | >4.50-5.99                         | >0.55-1.13                   |
| 3 <sup>rd</sup> quartile | >6.91-11.69                   | >5.99-8.84                         | >1.13-2.89                   |
| Top quartile             | >11.69-                       | >8.84-                             | >2.89-                       |
| <b>Women</b>             |                               |                                    |                              |
| Bottom quartile          | -9.01                         | -7.12                              | -0.64                        |
| 2 <sup>nd</sup> quartile | >9.01-18.59                   | >7.12-11.99                        | >0.64-1.17                   |
| 3 <sup>rd</sup> quartile | >18.59-30.89                  | >11.99-15.89                       | >1.17-2.65                   |
| Top quartile             | >30.89-                       | >15.89-                            | >2.65-                       |

**Supplemental Table 2.** Association of selected sociodemographic and clinical variables with leptin, adiponectin and hs-CRP serum values

|                             | N   | Leptin (ng mL <sup>-1</sup> ) |                     | Adiponectin (µg mL <sup>-1</sup> ) |                     | hs-CRP (mg L <sup>-1</sup> ) |                     |
|-----------------------------|-----|-------------------------------|---------------------|------------------------------------|---------------------|------------------------------|---------------------|
|                             |     | geometric mean                | p-value             | geometric mean                     | p-value             | geometric mean               | p-value             |
| Age (years)                 |     |                               |                     |                                    |                     |                              |                     |
| < 65                        | 336 | 7.8                           |                     | 7.2                                |                     | 1.17                         |                     |
| ≥ 65                        | 455 | 9.0                           | <sup>a</sup> 0.11   | 9.2                                | <sup>a</sup> <0.001 | 1.49                         | <sup>a</sup> 0.004  |
| Sex                         |     |                               |                     |                                    |                     |                              |                     |
| Male                        | 469 | 5.8                           |                     | 6.6                                |                     | 1.38                         |                     |
| Female                      | 322 | 14.8                          | <sup>b</sup> <0.001 | 11.5                               | <sup>b</sup> <0.001 | 1.29                         | <sup>b</sup> 0.36   |
| BMI (kg m <sup>-2</sup> )   |     |                               |                     |                                    |                     |                              |                     |
| < 25                        | 373 | 5.4                           |                     | 9.8                                |                     | 1.00                         |                     |
| ≥ 25                        | 418 | 12.7                          | <sup>c</sup> <0.001 | 7.2                                | <sup>c</sup> <0.001 | 1.76                         | <sup>c</sup> <0.001 |
| School education            |     |                               |                     |                                    |                     |                              |                     |
| < 10 <sup>th</sup> grade    | 385 | 8.3                           |                     | 8.3                                |                     | 1.61                         |                     |
| ≥ 10 <sup>th</sup> grade    | 403 | 8.6                           | <sup>c</sup> 0.92   | 8.3                                | <sup>c</sup> 0.21   | 1.13                         | <sup>c</sup> <0.001 |
| Smoking                     |     |                               |                     |                                    |                     |                              |                     |
| Never                       | 415 | 8.8                           |                     | 8.7                                |                     | 1.33                         |                     |
| Ever                        | 372 | 8.1                           | <sup>c</sup> 0.25   | 7.8                                | <sup>c</sup> 0.75   | 1.33                         | <sup>c</sup> 0.98   |
| Occupational work intensity |     |                               |                     |                                    |                     |                              |                     |
| Light                       | 331 | 8.6                           |                     | 8.5                                |                     | 1.25                         |                     |
| Moderate to heavy           | 443 | 8.4                           | <sup>c</sup> 0.40   | 8.1                                | <sup>c</sup> 0.19   | 1.43                         | <sup>c</sup> 0.20   |

<sup>a</sup> adjusted for case-control status, and sex

<sup>b</sup> adjusted for case-control status, and age

<sup>c</sup> adjusted for case-control status, sex and age

**Supplemental Table 3.** Pearson correlations of age at baseline, ALS-FRS and diagnostic delay with biomarkers

|                  |   | Leptin <sup>a</sup> | Adiponectin <sup>a</sup> | hs-CRP <sup>a</sup> |
|------------------|---|---------------------|--------------------------|---------------------|
| Age              | r | 0.027               | 0.281                    | 0.150               |
|                  | p | 0.65                | <0.01                    | 0.01                |
| ALS FRS          | r | -0.126              | -0.117                   | -0.227              |
|                  | p | 0.03                | 0.05                     | <0.01               |
| Diagnostic delay | r | 0.040               | 0.068                    | -0.012              |
|                  | p | 0.50                | 0.25                     | 0.84                |

<sup>a</sup> Log transformed

**Supplemental Table 4.** Univariate associations with survival in ALS cases

|                          | HR (95% confidence interval) |
|--------------------------|------------------------------|
| Sex                      |                              |
| Male                     | 0.72 (0.49, 1.06)            |
| Age (years)              | 1.04 (1.02, 1.06)            |
| ALS FRS                  | 0.94 (0.92, 0.96)            |
| Onset site               |                              |
| Bulbar                   | 0.99 (0.66, 1.48)            |
| Diagnostic delay (month) | 1.00 (0.96, 1.05)            |

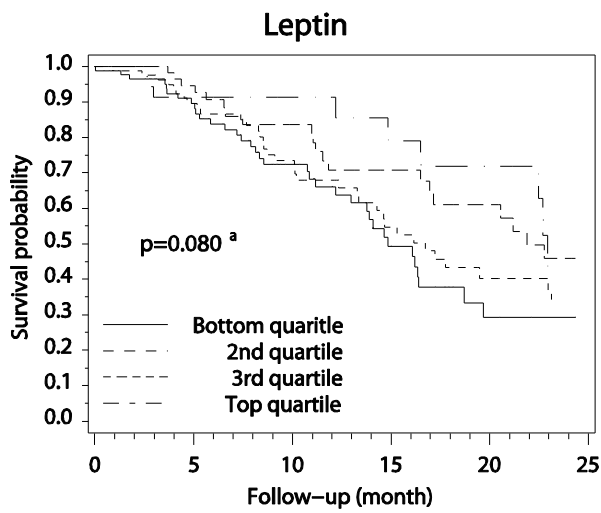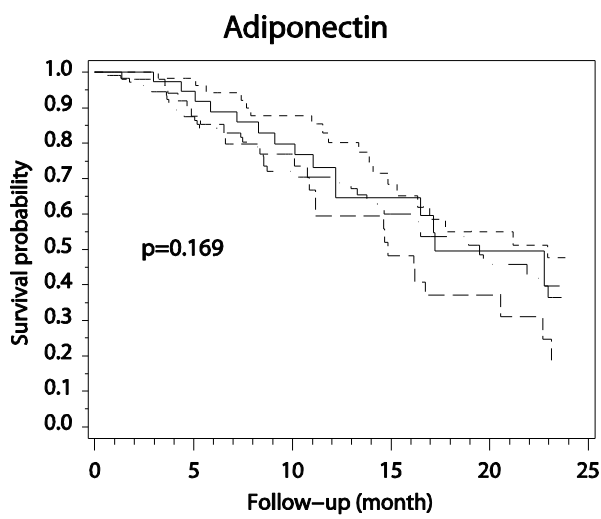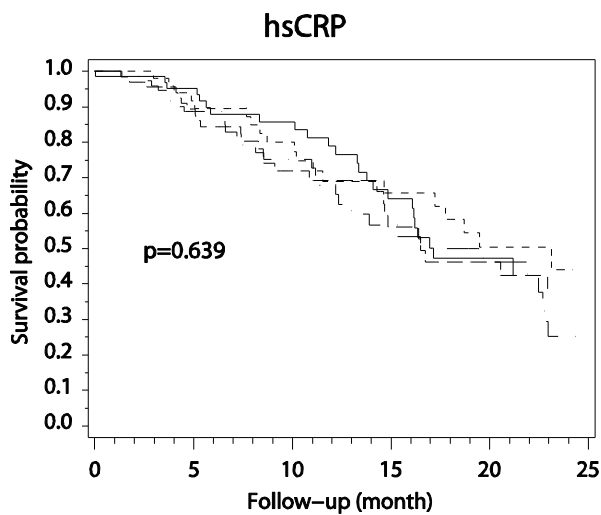

**Supplemental Figure 1.** Unadjusted survival probability by sex specific quartiles of leptin (N=277), adiponectin (N=279) and hs-CRP (N=279) ALS patients

<sup>a</sup> log-rank test p-value for equality over quartiles

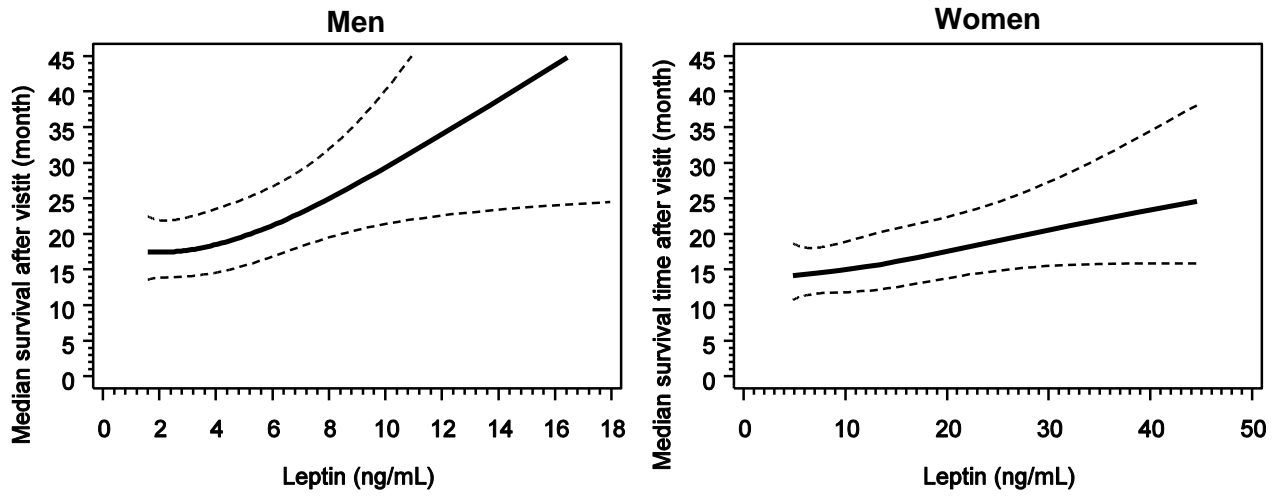

**Supplemental Figure 2.** Median survival time (bold line) (with 95% confidence band (dotted lines)) of ALS patents after baseline visit in month by leptin levels, adjusted for age, diagnostic delay, site of onset and ALS-FRS.
